# Supplementary material for: Neutralization of Interleukin-1β following Diffuse Traumatic Brain Injury in the Mouse Attenuates the Loss of Mature Oligodendrocytes
Source: PubMed Central journal article supplement (PMC6247990; doi:10.1089/neu.2018.5660), 2018-11-12
Supplement: Supp_Fig1.pdf [file Supp_Fig1.pdf]

## Supplementary Data

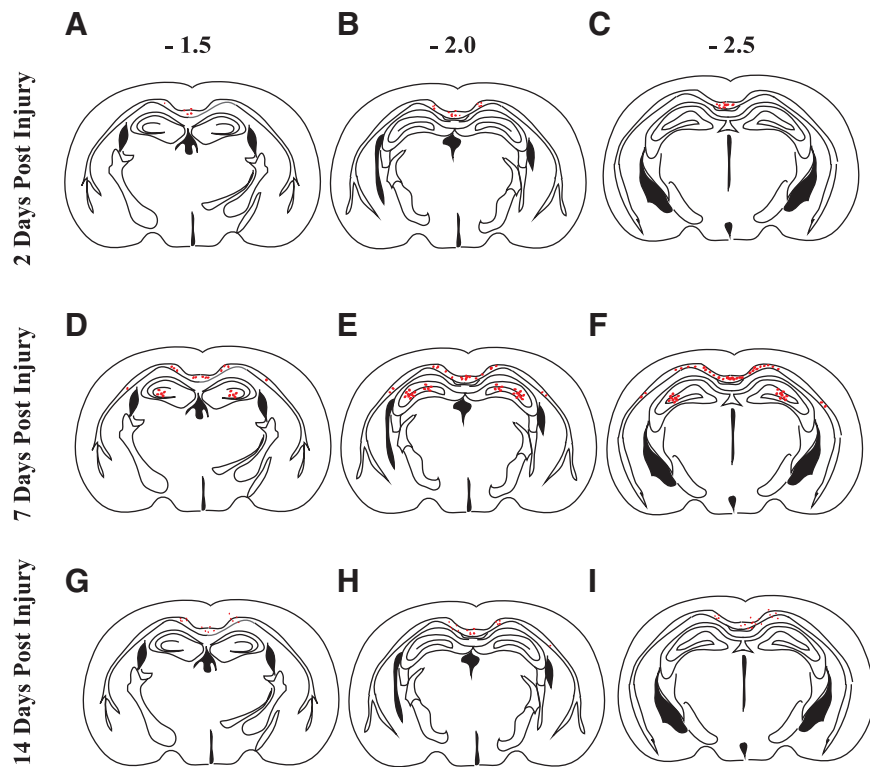

**SUPPLEMENTARY FIG. S1.** Schematic illustration of cleaved caspase-3 distribution (red) in cFPI CsA animals. Cleaved caspase-3 staining was made from coronal sections of three different levels from bregma (-1.5, -2.0, and -2.5). At two dpi, cleaved caspase-3 expression was similar among all treatment groups at all levels (A-C). At seven dpi, the caspase-3 expression was increased in brain-injured groups (D-F), although then declined and was similar among the treatment groups at 14 dpi (G-I). cFPI, central fluid percussion injury; dpi, days post-injury; CsA, inactive control antibody against cyclosporin A.
