# Supplementary material for: Neutralization of Interleukin-1β following Diffuse Traumatic Brain Injury in the Mouse Attenuates the Loss of Mature Oligodendrocytes
Source: PubMed Central journal article supplement (PMC6247990; doi:10.1089/neu.2018.5660), 2018-11-12
Supplement: Supp_Fig2.pdf [file Supp_Fig2.pdf]

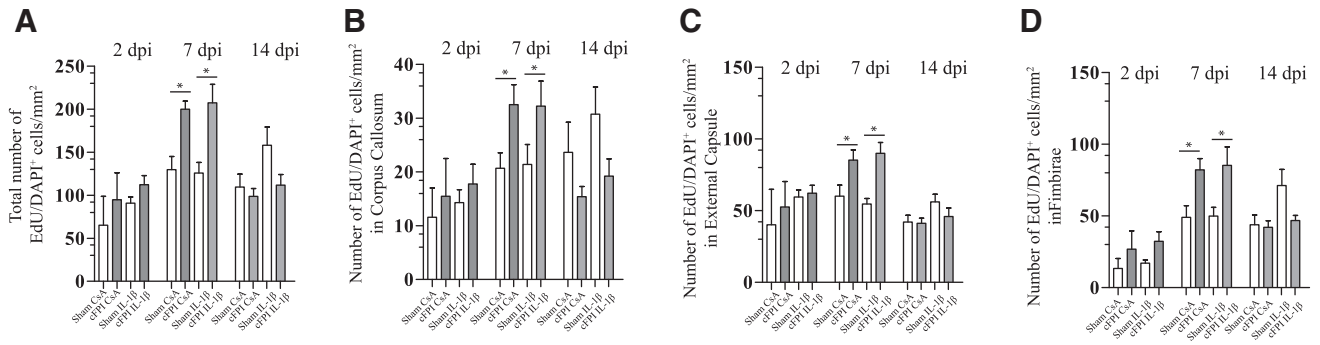

**SUPPLEMENTARY FIG. S2.** The number of proliferating cells in the corpus callosum, external capsule, and fimbriae. An increase ( $*p \leq 0.05$ ) was observed in the number of proliferating cells only at seven days post-injury (dpi) group for the total number of cells (**A**), in the corpus callosum (**B**), external capsule (**C**), and fimbriae (**D**) between the brain-injured (cFPI CsA and cFPI IL-1 $\beta$ ) and sham-injured (sham CsA and sham IL-1 $\beta$ ) groups, although not at two or 14 dpi. In graphs, results are presented as mean and standard error of the mean. cFPI, central fluid percussion injury; dpi, days post-injury; CsA, inactive control antibody against cyclosporin A; IL-1 $\beta$ , interleukin-1 beta.
