# Supplementary material for: Neutralization of Interleukin-1β following Diffuse Traumatic Brain Injury in the Mouse Attenuates the Loss of Mature Oligodendrocytes
Source: PubMed Central journal article supplement (PMC6247990; doi:10.1089/neu.2018.5660), 2018-11-12
Supplement: Supp_Fig3.pdf [file Supp_Fig3.pdf]

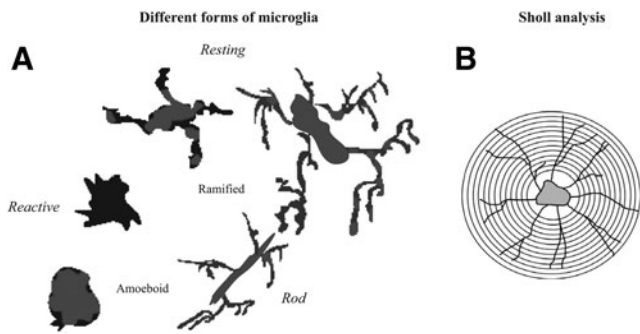

**SUPPLEMENTARY FIG. S3.** (A) Schematic illustration of microglia in different forms from resting to reactive. (B) Schematic illustration of the Sholl analysis of microglia/macrophages used in the present study.
